# Supplementary material
Source: publisher site journal article supplement (https://www.dovepress.com/article/489517)
Supplement: Supplementary file 1 [file get_supplementary_file.php]

**Supplementary File**

**Supplementary Table 1: Phytochemical Composition and Bioactivity Potential of Extracts**

| Sr NO | **Phytochemical** | **Presence in Leaves** | **Presence in Inflorescences** | **Properties** |
| --- | --- | --- | --- | --- |
| 1 | **Phenols** | Detected | Detected | Antioxidant properties |
| 2 | **Flavonoids** | Detected | Detected | Anti-inflammatory, and antimicrobial activities |
| 3 | **Tannins** | Detected | Detected | Astringent properties |
| 4 | **Coumarins** | Detected | Detected | Anticoagulant, anti-inflammatory, antimicrobial properties |
| 5 | **Alkaloids** | Detected | Detected | Pharmacological effects |
| 6 | **Terpenoids** | Detected | Detected | Antimicrobial, anti-inflammatory activities |
| 7 | **Saponins** | Detected | Detected | Immunomodulatory, antimicrobial properties |
| 8 | **Glycosides** | Detected | Detected | Various therapeutic effects including cardiac activity |
| 9 | **Sterols** | Not Detected | Detected | Important components of cell membranes, various health benefits |

**
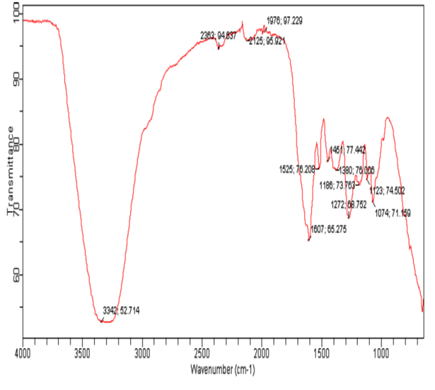
**

| **S. No.** | **Wavenumber (cm-1)** | **Functional groups present** |
| --- | --- | --- |
| 1. | 3342 | OH group |
| 2. | 1607 | Aromatic |
| 3. | 1272 | Sulfones, sulfonyl chloride, sulfates, sulfonamide |
| 4. | 1074 | Sulfoxide |

**B-1: FTIR spectra of ethyl acetate fractions of methanolic leaf extract of *C. oppositifolia***


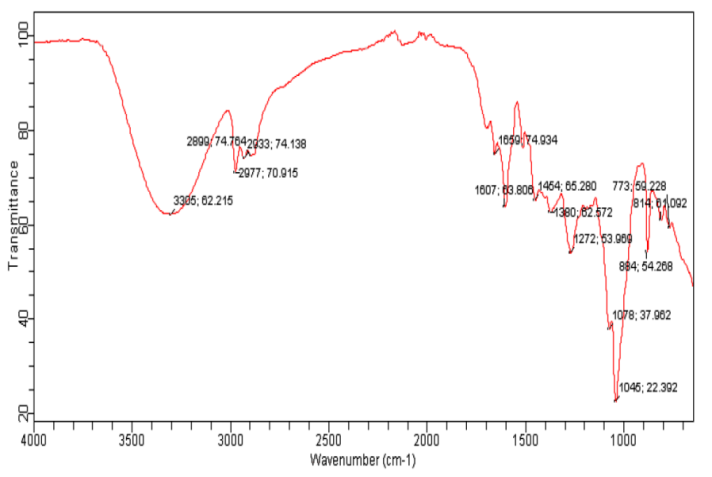


| **S. No.** | **Wavenumber (cm-1)** | **Functional groups present** |
| --- | --- | --- |
| 1. | 3385 | OH group |
| 2. | 3305 | N-H stretch/ O-H group(carboxylic acid) |
| 3. | 2977 | C-H (aldehyde) |
| 4. | 1607 | Aromatic |
| 5. | 1272 | C-N (Amines) |
| 6. | 1045 | Sulfoxide |

**Supplementary Figure 2: FTIR spectra of ethyl acetate fractions of methanolic leaf extract of C. oppositifolia**

**Supplementary Figure 3: NMR Spectra of Pure Compounds and Their Mixtures with Inflorescence and Leaf Oils**
